# Supplementary material
Source: PubMed Central journal article supplement (PMC6504632)
Supplement: supp_7.2.E246_2018-0142-1-at.pdf [file supp_7.2.E246_2018-0142-1-at.pdf]

**Appendix 1 (as supplied by the authors):** Variable importance for the top 20 features, as measured by mean decrease in the Gini index across 500 trees in a Random Forest Model

| Variable                           | Mean Decrease in Gini Index |
|------------------------------------|-----------------------------|
| Everywhere text "type 1"           | 4.798                       |
| Problem list text "type 1"         | 4.239                       |
| Medication A10AB--                 | 2.679                       |
| Age at diagnosis less than 40      | 2.652                       |
| Medication A10AB0-                 | 2.476                       |
| Encounter text "type 1"            | 2.152                       |
| Medication A10AB04                 | 2.066                       |
| Age at diagnosis less than 35      | 1.977                       |
| Medication Name "Lispro"           | 1.756                       |
| Age at diagnosis less than 30      | 1.575                       |
| Age at diagnosis less than 37      | 1.558                       |
| Age at diagnosis less than 25      | 1.551                       |
| Medication Name "insulin"          | 1.53                        |
| Age at diagnosis less than 22      | 1.512                       |
| Medication A10B---                 | 1.446                       |
| Medication A10A---                 | 1.379                       |
| Referral Name "endocrinology"      | 1.329                       |
| Age at diagnosis less than 32      | 1.288                       |
| Age at diagnosis less than 27      | 1.279                       |
| Medication A10B--- twice in 1 year | 1.265                       |
